# Supplementary material for: A Systematic Review of Individual Placement and Support, Employment, and Personal and Clinical Recovery
Source: Atypon-hosted journal article supplement (doi:10.1176/appi.ps.202000070), 2021-05-04
Supplement: appi.ps.202000070.ds001.pdf [file appi.ps.202000070.ds001.pdf]

Flow diagram of included studies.

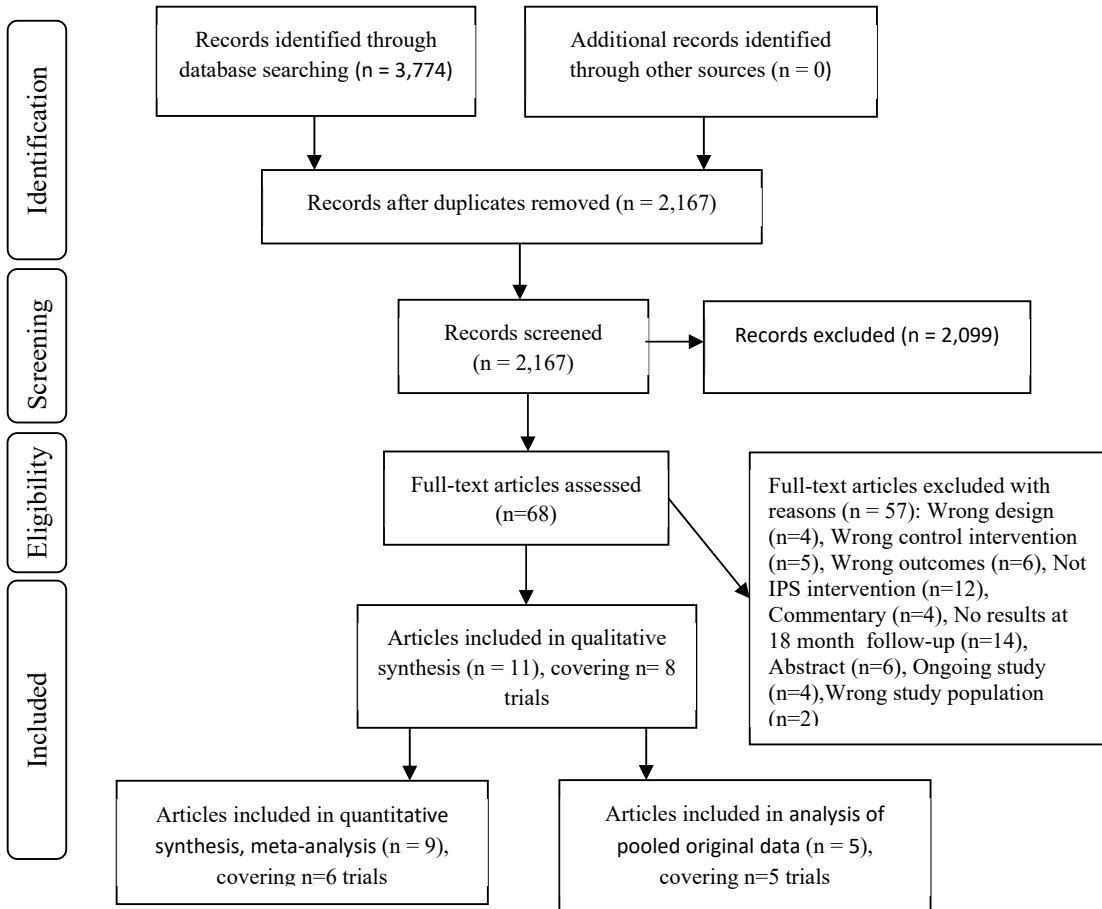

Risk of bias graph. Review authors' judgement about each risk of bias item presented as proportions across all included studies

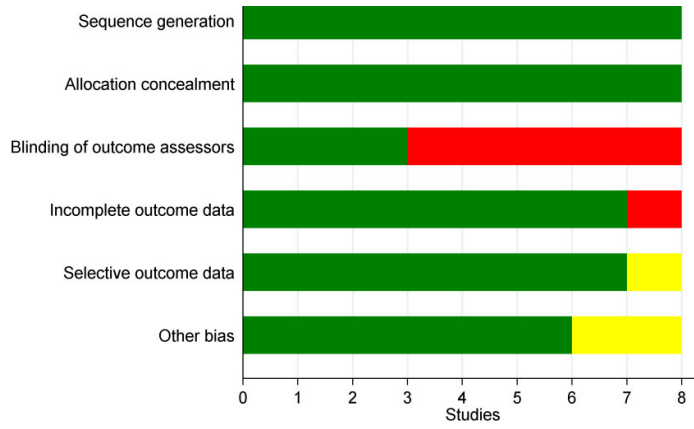

Literature search in Medline Database via Ovid performed: 21. June 2017 up-dated 11. January 2019.

| ID              | Search                                                                                                                                                                                                                                                                                                                                                                                                                                                                                                                                                                                                                                                                                                                                                                                                                                                                                                                 | Results |
|-----------------|------------------------------------------------------------------------------------------------------------------------------------------------------------------------------------------------------------------------------------------------------------------------------------------------------------------------------------------------------------------------------------------------------------------------------------------------------------------------------------------------------------------------------------------------------------------------------------------------------------------------------------------------------------------------------------------------------------------------------------------------------------------------------------------------------------------------------------------------------------------------------------------------------------------------|---------|
| 1               | exp Affective Disorders, Psychotic/                                                                                                                                                                                                                                                                                                                                                                                                                                                                                                                                                                                                                                                                                                                                                                                                                                                                                    | 2253    |
| 2               | exp Bipolar Disorder/                                                                                                                                                                                                                                                                                                                                                                                                                                                                                                                                                                                                                                                                                                                                                                                                                                                                                                  | 36966   |
| 3               | exp Delusions/                                                                                                                                                                                                                                                                                                                                                                                                                                                                                                                                                                                                                                                                                                                                                                                                                                                                                                         | 7440    |
| 4               | exp Depressive Disorder, Major/                                                                                                                                                                                                                                                                                                                                                                                                                                                                                                                                                                                                                                                                                                                                                                                                                                                                                        | 25551   |
| 5               | exp Psychotic Disorders/                                                                                                                                                                                                                                                                                                                                                                                                                                                                                                                                                                                                                                                                                                                                                                                                                                                                                               | 48324   |
| 6               | exp Schizophrenia/                                                                                                                                                                                                                                                                                                                                                                                                                                                                                                                                                                                                                                                                                                                                                                                                                                                                                                     | 97949   |
| 7               | (((affective or mental*) adj3 (disorder* or ill*)) or (bipolar adj3 (disorder* or illness* or depress*)) or ((severe* or unipolar or major or manic) adj3 depress*) or mania* or psychoses or psychosis or psychotic or schizo* or delusion*).mp. [mp=title, abstract, original title, name of substance word, subject heading word, keyword heading word, protocol supplementary concept word, rare disease supplementary concept word, unique identifier, synonyms]                                                                                                                                                                                                                                                                                                                                                                                                                                                  | 461089  |
| 8               | 1 or 2 or 4 or 5 or 6 or 7                                                                                                                                                                                                                                                                                                                                                                                                                                                                                                                                                                                                                                                                                                                                                                                                                                                                                             | 461178  |
| 9               | exp Employment, Supported/                                                                                                                                                                                                                                                                                                                                                                                                                                                                                                                                                                                                                                                                                                                                                                                                                                                                                             | 1073    |
| 10              | exp Rehabilitation, Vocational/                                                                                                                                                                                                                                                                                                                                                                                                                                                                                                                                                                                                                                                                                                                                                                                                                                                                                        | 9980    |
| 11              | 9 or 10                                                                                                                                                                                                                                                                                                                                                                                                                                                                                                                                                                                                                                                                                                                                                                                                                                                                                                                | 9980    |
| 12              | (((supported adj3 employment*) or (vocational adj3 (recover* or rehabilitation* or retraining)) or (occupational adj3 (recover* or rehabilitation* or retraining)) or (individual* adj3 placement adj3 support*)).mp. [mp=title, abstract, original title, name of substance word, subject heading word, keyword heading word, protocol supplementary concept word, rare disease supplementary concept word, unique identifier, synonyms]                                                                                                                                                                                                                                                                                                                                                                                                                                                                              | 11805   |
| 13              | 11 or 12                                                                                                                                                                                                                                                                                                                                                                                                                                                                                                                                                                                                                                                                                                                                                                                                                                                                                                               | 11805   |
| 14              | 8 and 13                                                                                                                                                                                                                                                                                                                                                                                                                                                                                                                                                                                                                                                                                                                                                                                                                                                                                                               | 2872    |
| 15 <sup>1</sup> | (((singl* or doubl* or treb* or tripl*) adj (blind*3 or mask*3)) or (allocated adj2 random)).tw. or (clin* adj25 trial*).ti,ab. or (clinic* adj trial*1).tw. or (double-blind* or random*).af. or clinical trial.pt. or clinical trials as topic.sh. or controlled clinical trial.pt. or double blind method.sh. or single blind method.sh. or double-blind method.sh. or single-blind method.sh. or drug therapy.fs. or exp clinical trials as topic/ or exp research design/ or placebo*.tw. or placebos.sh. or practice guideline.pt. or random allocation.sh. or random*.tw. or random.af. or randomized controlled trial.pt. or randomized controlled trials as topic.sh. or randomized.ab. or randomly allocated.tw. or randomly.ab. or single-blind method.sh. or trial.ab. or trial.ti.) not (case report.tw. or letter.pt. or historical article.pt. or review of reported cases.pt. or multicase review.pt.) | 3347555 |
| 16              | 14 and 15                                                                                                                                                                                                                                                                                                                                                                                                                                                                                                                                                                                                                                                                                                                                                                                                                                                                                                              | 495     |

Note <sup>1</sup>The filter for randomized controlled trials is from: [http://videncentret.dk/Forskertservice/Soegefiltre?sc\\_lang=en](http://videncentret.dk/Forskertservice/Soegefiltre?sc_lang=en)

Study characteristics of the eight trails included in the review.

| Author/Year                                                          | Population                                                                                                               | Interventions                                                             | Outcomes                                                                                               | Results                                                                                                                                                     |
|----------------------------------------------------------------------|--------------------------------------------------------------------------------------------------------------------------|---------------------------------------------------------------------------|--------------------------------------------------------------------------------------------------------|-------------------------------------------------------------------------------------------------------------------------------------------------------------|
| Mueser et al. 2004 <sup>30</sup>                                     | n=204<br>Male=62%<br>Schizophrenia or Schizoaffective=75%,<br>Bipolar disorder=5%,<br>Major depression=17%,<br>Others=3% | I: IPS<br><br>C1: Psychosocial intervention<br><br>C2: Treatment as usual | Self-esteem<br><br>Quality of life<br><br>Psychiatric symptoms<br><br>Global assessment of functioning | No difference between groups on any of the outcomes.                                                                                                        |
| Bond et al. 2007 <sup>26</sup> /Kukla et al. 2013 <sup>29</sup>      | n=187,<br>Male=64%,<br>Schizophrenia spectrum=56%,<br>Affective disorder=41%,<br>Other=3%                                | I: IPS<br><br>C: Diversified Placement approach                           | Psychiatric symptoms                                                                                   | No difference between groups on any of the outcomes.                                                                                                        |
| Michon et al 2014 <sup>16</sup>                                      | n=151,<br>Male=74%,<br>Psychotic disorder=59%<br>Other=41%                                                               | I: IPS<br><br>C: Traditional vocational rehabilitation                    | Self-esteem<br><br>Quality of life<br><br>Psychiatric symptoms                                         | No significant differences between groups.<br><br>Significant improvements for all outcomes in those who were competitively employed at or before follow-up |
| Drake et al. 1999 <sup>27</sup>                                      | n=152,<br>Male=39%,<br>Schizophrenia spectrum=67%,<br>Bipolar=14%,<br>Depression=17%,<br>Other=2%                        | I: IPS<br><br>C: EVR (enhanced vocational rehabilitation)                 | Self-esteem<br><br>Global assessment of functioning<br><br>Psychiatric symptoms                        | No difference between groups on any of the outcomes.                                                                                                        |
| Kin Wong et al. 2008 <sup>28</sup>                                   | n=92,<br>Male=59%,<br>Schizophrenia spectrum=70%,<br>Affective disorder=19%,<br>Other=11%                                | I: IPS<br><br>C: Conventional rehabilitation program                      | Quality of life<br><br>Psychiatric symptoms                                                            | No difference between groups on any of the outcomes.                                                                                                        |
| Burns et al. 2007 <sup>24</sup> /<br>Burns et al. 2009 <sup>23</sup> | n=312,<br>Male=60%,<br>Schizophrenia spectrum=80%,<br>Bipolar disorder=17%,<br>Other=3%                                  | I: IPS<br><br>C: Traditional vocational services                          | Quality of life<br><br>Psychiatric symptoms<br><br>Global assessment of functioning (symptoms)         | No difference between groups on any of the outcomes.<br><br>Significant differences in all measures apart from anxiety,                                     |

|                                                                            |                                                                                         |                                                        |                                                                                                        |                                                                                                  |
|----------------------------------------------------------------------------|-----------------------------------------------------------------------------------------|--------------------------------------------------------|--------------------------------------------------------------------------------------------------------|--------------------------------------------------------------------------------------------------|
|                                                                            |                                                                                         |                                                        | Global assessment of functioning (disability)                                                          | positive symptoms and depression in those who were competitively employed at or before follow-up |
| Areberg et al. 2013 <sup>22</sup> /<br>Bejerholm et al. 2015 <sup>25</sup> | n=120,<br>Male=56%,<br>Schizophrenia spectrum=65%,<br>Bipolar disorder=7%,<br>Others=28 | I: IPS<br><br>C: Traditional vocational rehabilitation | Empowerment<br><br>Quality of life<br><br>Psychiatric symptoms                                         | No difference between groups on any of the outcomes.                                             |
| Christensen et al 2019 <sup>31</sup>                                       | n=720,<br>Male=61%,<br>Schizophrenia spectrum=77%,<br>Affective disorder=23%            | I: IPS<br><br>C: Traditional vocational rehabilitation | Self-esteem<br><br>Quality of life<br><br>Psychiatric symptoms<br><br>Global assessment of functioning | No difference between groups on any of the outcomes.                                             |

Risk of bias summary: review authors' judgements about each risk of bias item for each study included.

 Low risk of bias    
  Unclear risk of bias    
  High risk of bias

|                                                              | Sequence generation                                                               | Allocation concealment                                                            | Blinding of outcome assessors                                                     | Incomplete outcome data                                                           | Selective outcome data                                                            | Other bias                                                                          |
|--------------------------------------------------------------|-----------------------------------------------------------------------------------|-----------------------------------------------------------------------------------|-----------------------------------------------------------------------------------|-----------------------------------------------------------------------------------|-----------------------------------------------------------------------------------|-------------------------------------------------------------------------------------|
| Areberg 2013 <sup>22</sup> /<br>Bejerholm 2015 <sup>25</sup> |  |  |  |  |  |  |
| Bond 2007 <sup>26</sup> /Kukla 2013 <sup>29</sup>            |  |  |  |  |  |  |
| Burns 2007 <sup>24</sup> /2009 <sup>23</sup>                 |  |  |  |  |  |  |
| Christensen 2019 <sup>31</sup>                               |  |  |  |  |  |  |
| Drake 1999 <sup>27</sup>                                     |  |  |  |  |  |  |
| Michon 2014 <sup>16</sup>                                    |  |  |  |  |  |  |
| Mueser 2004 <sup>30</sup>                                    |  |  |  |  |  |  |
| Kin Wong 2008 <sup>28</sup>                                  |  |  |  |  |  |  |

Scales used by trials providing data for meta-analyses and pooled analyses.

|                                                              | Self-esteem                             | Empowerment            | Quality of life                                                      | Symptoms                                                                                                                                                     | Level of functioning                                                                                              |
|--------------------------------------------------------------|-----------------------------------------|------------------------|----------------------------------------------------------------------|--------------------------------------------------------------------------------------------------------------------------------------------------------------|-------------------------------------------------------------------------------------------------------------------|
| Areberg 2013 <sup>22</sup> /<br>Bejerholm 2015 <sup>25</sup> |                                         | Empowerment Scale (ES) | The Manchester Short Assessment of Quality of Life version 2 (MANSA) | The Brief Psychiatric Rating Scale (BPRS)                                                                                                                    |                                                                                                                   |
| Bond 2007 <sup>26</sup> /<br>Kukla 2013 <sup>29</sup>        |                                         |                        | Abbreviated Version of Lehman's Quality of Life Interview            | Positive and Negative Symptom Scale (PANSS)                                                                                                                  |                                                                                                                   |
| Burns 2007 <sup>24</sup> /2009 <sup>23</sup>                 | Rosenberg Self-Esteem Scale (RSE scale) |                        | Lancashire Quality of Life Profile – European Version: (LQoLP-EU)    | Positive and Negative Symptom Scale (PANSS),<br>Hospital Anxiety and Depression Scale (HADS)                                                                 | Global Assessment of Functioning – symptoms (GAF-S),<br><br>Global Assessment of Functioning – Disability (GAF-D) |
| Christensen 2019 <sup>31</sup>                               | Rosenberg Self-Esteem Scale (RSE scale) | Empowerment Scale (ES) | Short-Form Health Survey (SF12)                                      | Scale for the Assessment of Negative Symptoms (SANS),<br><br>Scale for the Assessment of Positive Symptoms (SAPS),<br><br>Hamilton depression scale (Ham D6) | Global Assessment of functioning – function (GAF-F)                                                               |
| Michon 2014 <sup>16</sup>                                    | Rosenberg Self-Esteem Scale (RSE scale) |                        | The Manchester Short Assessment of Quality of Life version 2 (MANSA) | Mental health inventory-5                                                                                                                                    |                                                                                                                   |
| Mueser. 2004 <sup>30</sup>                                   | Rosenberg Self-Esteem Scale (RSE scale) |                        | Brief Version of the Quality of Life Interview                       | Positive and Negative Symptom Scale (PANSS)                                                                                                                  | Global Assessment Scale (GAS)                                                                                     |

Associations between weeks in employment and personal and clinical recovery adjusted for IPS.

|                             | <b>SMD</b>              | <b>CI</b>   | <b>p-value</b> |
|-----------------------------|-------------------------|-------------|----------------|
| <b>Self esteem</b>          |                         |             |                |
| < median weeks              | 0.14                    | -0.01,0.30  | 0.065          |
| ≥ median weeks              | 0.17                    | 0.00,0.35   | 0.049          |
| <b>Empowerment</b>          |                         |             |                |
| < median weeks              | 0.18                    | -0.02,0.37  | 0.083          |
| ≥ median weeks              | 0.25                    | 0.06,0.44   | 0.011          |
| <b>Quality of Life</b>      |                         |             |                |
| < median weeks              | 0.03                    | -0.16,0.22  | 0.768          |
| ≥ median weeks              | 0.34                    | 0.14,0.54   | 0.001          |
| <b>Psychotic symptoms</b>   |                         |             |                |
| < median weeks              | 0.02                    | -0.12,0.16  | 0.758          |
| ≥ median weeks              | -0.11                   | -0.27,0.04  | 0.143          |
| <b>Negative symptoms</b>    |                         |             |                |
| < median weeks              | -0.25                   | -0.40,-0.09 | 0.002          |
| ≥ median weeks              | -0.41                   | -0.56,-0.26 | 0.000          |
| <b>Anxiety</b>              |                         |             |                |
| < median weeks              | -0.02                   | -0.28,0.23  | 0.853          |
| ≥ median weeks              | -0.01                   | -0.28,0.26  | 0.936          |
| <b>Level of functioning</b> |                         |             |                |
| < median weeks              | 0.23                    | 0.07,0.39   | 0.005          |
| ≥ median weeks              | 0.59                    | 0.42,0.77   | 0.000          |
| <b>Depression</b>           |                         |             |                |
|                             | <b>Log. Reg. coeff.</b> |             |                |
| < median weeks              | -0.45                   | -0.91,-0.00 | 0.049          |
| ≥ median weeks              | -0.61                   | -1.09,-0.13 | 0.012          |

Note: < median. weeks: less than median weeks of employment;> median weeks: more than median weeks of employment.
